# Supplementary material for: Pre-Vaccine Positivity of SARS-CoV-2 Antibodies in Alberta, Canada during the First Two Waves of the COVID-19 Pandemic
Source: PubMed Central journal article supplement (PMC8552659; doi:10.1128/spectrum.00291-21), 2021-08-18
Supplement: spectrum00291-21_supp_1_seq6.pdf [file spectrum00291-21_supp_1_seq6.pdf]

# Supplementary material – TABLE OF CONTENTS

Manuscript title:

**Pre-vaccine positivity of SARS-CoV-2 antibodies in Alberta, Canada during the first two waves of the COVID-19 pandemic**

## *Figures*

**Figure S1.** IgG Positivity of major Alberta cities or geographical areas.

**Figure S2.** A) Crude and B) Adjusted seroprevalence rates according to different criteria for positivity: instrument response  $\geq 0.7$  (grey dashed line), instrument response  $\geq 1.4$  (black dashed line), instrument response  $\geq 1.4$  with confirmation by DiaSorin (DS) (solid black line).

## *Tables*

**Table S1.** Timeline of COVID-19-associated public health measures implemented in Alberta, Canada.

**Table S2.** COVID-19 Seroprevalence of Alberta by age group and sex at each monthly snapshot ( $N = 93,993$ ).

**Table S3.** COVID-19 Seroprevalence by cities or areas of residence at each monthly snapshot, unknown and out of province postal codes excluded ( $N = 92,751$ ).

**Table S4.** Socioeconomic characteristics of IgG negative and positive patients' neighbourhoods of residence from the Alberta Serosurvey, June 2020 – January 2021.

**Table S5.** Count of Albertans from the Serosurveys according to their NAAT and IgG results with different criteria ( $N = 66,171$ ).

**Table S6.** Select demographic distributions of seropositive patients ( $N = 1237$ ) according to their prior status by NAAT.

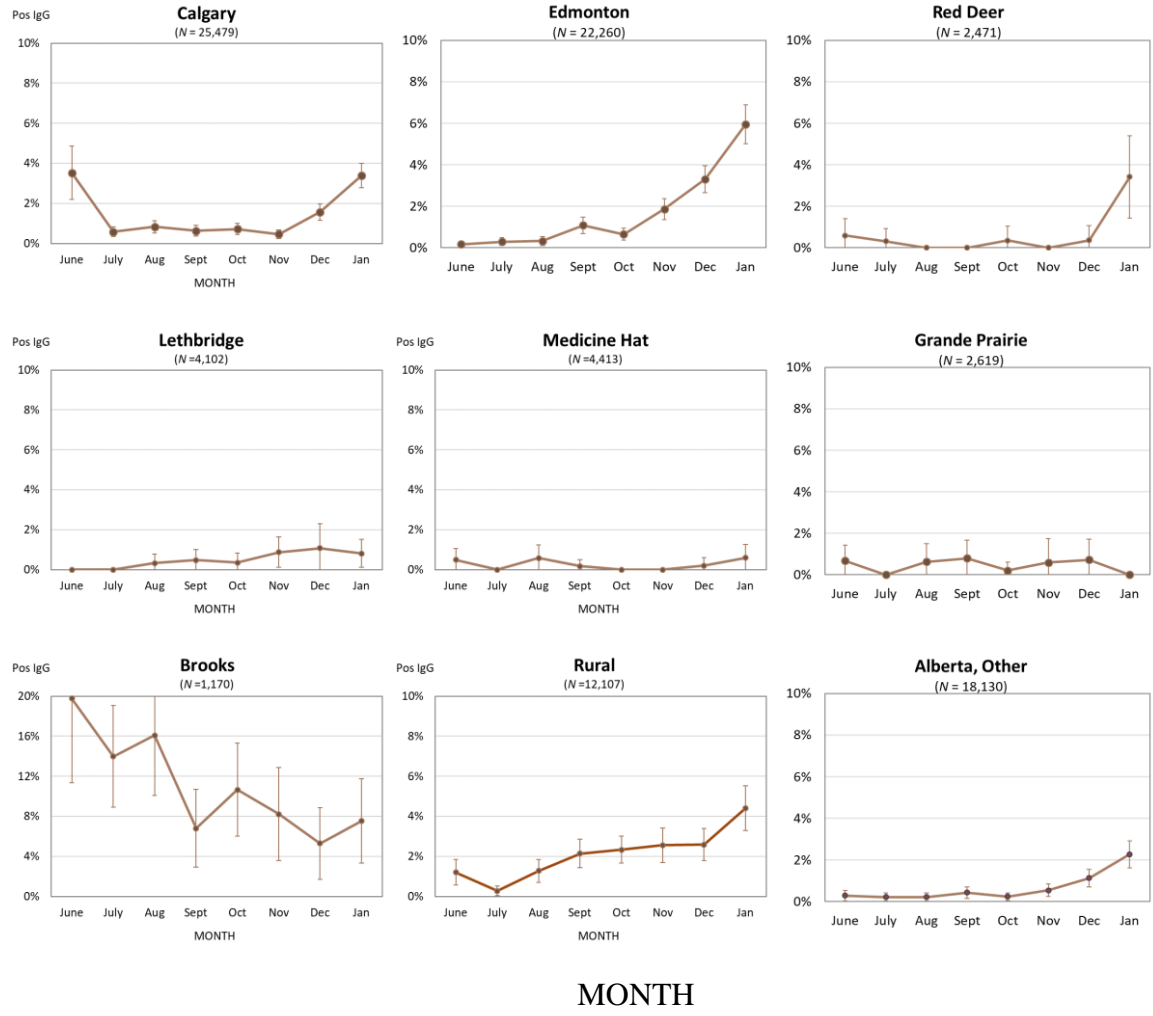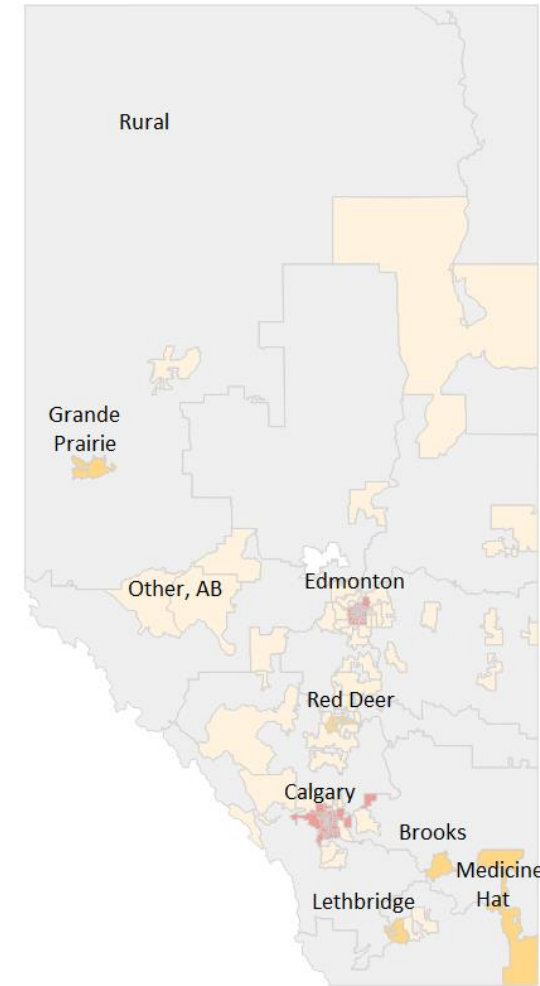

**Figure S1.** IgG Positivity of major Alberta cities or geographical areas, with 95% CI error bars. Please note the two-times larger y-axis scale for Brooks. Calgary and Edmonton are shaded in red; Grande Prairie, Lethbridge, Medicine Hat, Red Deer and Brooks are shaded in orange; Rural areas shaded in grey; and the remaining cities in the Alberta are shaded in beige.

### Positivity, Crude

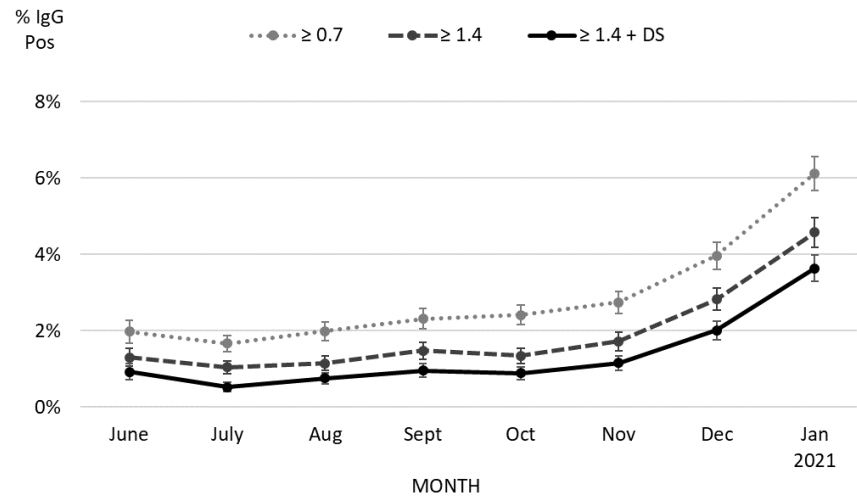

A)

### Positivity, Adjusted for Sex and Age

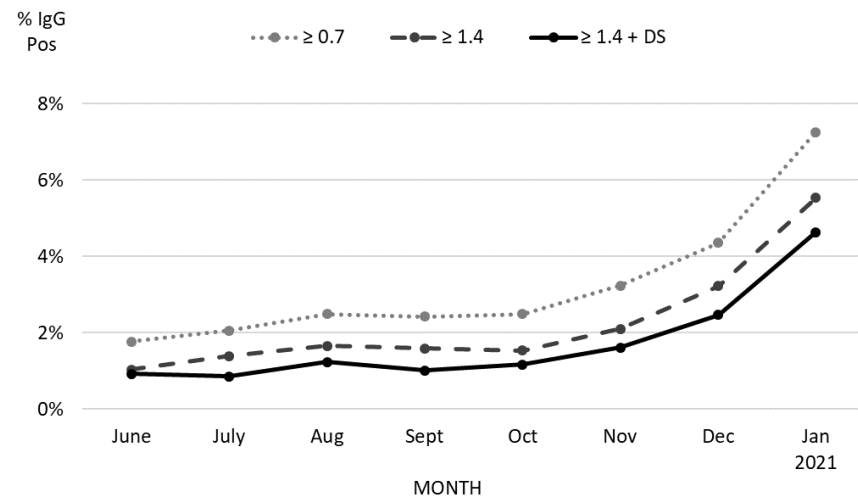

B)

**Figure S2.** A) Crude and B) Adjusted seroprevalence rates according to different criteria for positivity: instrument response  $\geq 0.7$  (grey dashed line), instrument response  $\geq 1.4$  (black dashed line), instrument response  $\geq 1.4$  with confirmation by DiaSorin (DS) (solid black line).

**Table S1.** Timeline of COVID-19-associated public health measures implemented in Alberta, Canada.

| Date              | Measure                                                                                                                                                                   |
|-------------------|---------------------------------------------------------------------------------------------------------------------------------------------------------------------------|
| March 15, 2020    | Province of Alberta declares a public health state of emergency with regards to COVID-19, closing most non-essential businesses, services as well as schools.             |
| April 6, 2020     | Use of non-medical face masks in those >2 years of age is advised by public health when indoor spacing of 6 feet (2 meters) or more cannot be maintained.                 |
| June 12, 2020     | While public health restrictions exist, province permits businesses and in-restaurant dining to resume.                                                                   |
| September 1, 2020 | Students return to school with a compulsory masking rule in-effect.                                                                                                       |
| October 26, 2020  | Government imposes mandatory 15-person limit on social gatherings as cases rise.                                                                                          |
| November 24, 2020 | New public health restrictions by government in response to rising case numbers closing schools, limiting attendance at places of worship, and banning social gatherings. |
| December 15, 2020 | COVID-19 vaccines launched in Alberta for long-term care residents.                                                                                                       |
| January 8, 2021   | COVID-19 vaccines made available to front-line healthcare workers managing COVID-19 patients.                                                                             |
| January 11, 2021  | Students return to in-person learning in schools.                                                                                                                         |
| January 14, 2021  | Restrictions eased for outdoor gatherings and personal service businesses permitted to open as case counts decline.                                                       |

Reference: 12.

**Table S2.** COVID-19 Seroprevalence of Alberta by age group and sex at each monthly snapshot ( $N = 93,993$ ).

| Demographic       | June               |                                 |                            | July               |                                 |                            | August             |                                 |                            |
|-------------------|--------------------|---------------------------------|----------------------------|--------------------|---------------------------------|----------------------------|--------------------|---------------------------------|----------------------------|
|                   | Survey size<br>$n$ | IgG Positive count<br>$n_{POS}$ | % IgG Positive<br>(95% CI) | Survey size<br>$n$ | IgG Positive count<br>$n_{POS}$ | % IgG Positive<br>(95% CI) | Survey size<br>$n$ | IgG Positive count<br>$n_{POS}$ | % IgG Positive<br>(95% CI) |
| Overall, crude    | 8,442              | 78                              | 0.924<br>(0.720 – 1.128)   | 13,175             | 68                              | 0.516<br>(0.394 – 0.639)   | 12,284             | 92                              | 0.749<br>(0.596 – 0.901)   |
| Overall, adjusted |                    |                                 | 0.920<br>(0.911 – 0.929)   |                    |                                 | 0.859<br>(0.851 – 0.868)   |                    |                                 | 1.235<br>(1.225 – 1.246)   |
| Sex               |                    |                                 |                            |                    |                                 |                            |                    |                                 |                            |
| Male              | 3,707              | 39                              | 1.052<br>(0.724 – 1.381)   | 5,749              | 34                              | 0.591<br>(0.393 – 0.790)   | 5,214              | 40                              | 0.767<br>(0.530 – 1.004)   |
| Female            | 4,735              | 39                              | 0.824<br>(0.566 – 1.081)   | 7,426              | 34                              | 0.458<br>(0.304 – 0.611)   | 7,070              | 52                              | 0.736<br>(0.536 – 0.935)   |
| Unknown           |                    |                                 |                            |                    |                                 |                            |                    |                                 |                            |
| Age group (y)     |                    |                                 |                            |                    |                                 |                            |                    |                                 |                            |
| 0-9               | 96                 | 0                               | 0<br>(0.000 – 0.000)       | 139                | 2                               | 1.550<br>(0.000 – 3.682)   | 121                | 4                               | 3.306<br>(0.120 – 6.491)   |
| 10-19             | 245                | 2                               | 0.816<br>(0.000 – 1.943)   | 449                | 4                               | 0.891<br>(0.022 – 1.760)   | 390                | 2                               | 0.513<br>(0.000 – 1.222)   |
| 20-29             | 696                | 6                               | 0.862<br>(0.175 – 1.549)   | 976                | 11                              | 1.127<br>(0.465 – 1.789)   | 946                | 9                               | 0.951<br>(0.333 – 1.570)   |
| 30-39             | 1,073              | 16                              | 1.491<br>(0.766 – 2.216)   | 1,687              | 11                              | 0.652<br>(0.268 – 1.036)   | 1,577              | 13                              | 0.824<br>(0.378 – 1.271)   |
| 40-49             | 977                | 15                              | 1.535<br>(0.764 – 2.306)   | 1,669              | 15                              | 0.899<br>(0.446 – 1.352)   | 1,478              | 15                              | 1.015<br>(0.504 – 1.526)   |

|                            |       |    |                          |       |    |                          |       |    |                          |
|----------------------------|-------|----|--------------------------|-------|----|--------------------------|-------|----|--------------------------|
| 50-59                      | 1,347 | 11 | 0.817<br>(0.336 – 1.297) | 2,140 | 13 | 0.607<br>(0.278 – 0.937) | 1,959 | 22 | 1.123<br>(0.656 – 1.590) |
| 60-69                      | 1,706 | 9  | 0.528<br>(0.184 – 0.871) | 2,716 | 5  | 0.184<br>(0.023 – 0.345) | 2,523 | 10 | 0.396<br>(0.151 – 0.642) |
| 70-79                      | 1,405 | 11 | 0.783<br>(0.322 – 1.244) | 2,157 | 6  | 0.278<br>(0.056 – 0.500) | 1,979 | 8  | 0.404<br>(0.125 – 0.684) |
| ≥ 80                       | 897   | 8  | 0.892<br>(0.277 – 1.507) | 1,252 | 1  | 0.080<br>(0.000 – 0.236) | 1,311 | 9  | 0.686<br>(0.240 – 1.133) |
| Median Age<br>(years, IQR) |       |    | 48.0<br>(37.0 – 67.0)    |       |    | 41.5<br>(32.0 – 55.8)    |       |    | 51.0<br>(37.3 – 62.8)    |

**Table S2 (continued).** COVID-19 Seroprevalence of Alberta by age group and sex at each monthly snapshot ( $N = 93,993$ ).

| Demographic       | September               |                                               |                          | October                 |                                               |                          | November                |                                               |                          |
|-------------------|-------------------------|-----------------------------------------------|--------------------------|-------------------------|-----------------------------------------------|--------------------------|-------------------------|-----------------------------------------------|--------------------------|
|                   | Survey size<br><i>n</i> | IgG Positive count<br><i>n</i> <sub>POS</sub> | % IgG Positive (95% CI)  | Survey size<br><i>n</i> | IgG Positive count<br><i>n</i> <sub>POS</sub> | % IgG Positive (95% CI)  | Survey size<br><i>n</i> | IgG Positive count<br><i>n</i> <sub>POS</sub> | % IgG Positive (95% CI)  |
| Overall, crude    | 12,006                  | 115                                           | 0.958<br>(0.784 – 1.132) | 13,490                  | 119                                           | 0.882<br>(0.724 – 1.040) | 11,471                  | 132                                           | 1.151<br>(0.956 – 1.346) |
| Overall, adjusted |                         |                                               | 1.015<br>(1.005 – 1.024) |                         |                                               | 1.162<br>(1.152 – 1.172) |                         |                                               | 1.607<br>(1.595 – 1.619) |
| Sex               |                         |                                               |                          |                         |                                               |                          |                         |                                               |                          |
| Male              | 5,149                   | 50                                            | 0.971<br>(0.703 – 1.239) | 5,860                   | 46                                            | 0.785<br>(0.559 – 1.011) | 5,054                   | 68                                            | 1.345<br>(1.028 – 1.663) |
| Female            | 6,857                   | 65                                            | 0.948<br>(0.719 – 1.177) | 7,631                   | 73                                            | 0.957<br>(0.738 – 1.175) | 6,416                   | 64                                            | 0.998<br>(0.754 – 1.241) |
| Unknown           |                         |                                               |                          |                         |                                               |                          | 1                       | 0                                             | 0<br>(0.000 – 0.000)     |
| Age group (y)     |                         |                                               |                          |                         |                                               |                          |                         |                                               |                          |
| 0-9               | 86                      | 1                                             | 1.163<br>(0.000 – 3.429) | 130                     | 3                                             | 2.308<br>(0.000 – 4.889) | 107                     | 4                                             | 3.738<br>(0.144 – 7.333) |
| 10-19             | 285                     | 3                                             | 1.053<br>(0.000 – 2.237) | 377                     | 5                                             | 1.326<br>(0.171 – 2.481) | 337                     | 5                                             | 1.484<br>(0.193 – 2.774) |
| 20-29             | 865                     | 11                                            | 1.272<br>(0.525 – 2.018) | 1,029                   | 11                                            | 1.069<br>(0.441 – 1.697) | 895                     | 18                                            | 2.011<br>(1.091 – 2.931) |
| 30-39             | 1,482                   | 13                                            | 0.877<br>(0.402 – 1.352) | 1,784                   | 17                                            | 0.953<br>(0.502 – 1.404) | 1,567                   | 17                                            | 1.085<br>(0.572 – 1.598) |
| 40-49             | 1,472                   | 15                                            | 1.019<br>(0.506 – 1.532) | 1,769                   | 18                                            | 1.018<br>(0.550 – 1.485) | 1,574                   | 24                                            | 1.525<br>(0.919 – 2.130) |

|                            |       |    |                          |       |    |                          |       |    |                          |
|----------------------------|-------|----|--------------------------|-------|----|--------------------------|-------|----|--------------------------|
| 50-59                      | 1,898 | 19 | 1.001<br>(0.553 – 1.449) | 2,249 | 33 | 1.467<br>(0.970 – 1.964) | 1,879 | 20 | 1.064<br>(0.600 – 1.528) |
| 60-69                      | 2,552 | 26 | 1.019<br>(0.629 – 1.408) | 2,839 | 18 | 0.634<br>(0.342 – 0.926) | 2,383 | 22 | 0.923<br>(0.539 – 1.307) |
| 70-79                      | 2,027 | 14 | 0.691<br>(0.330 – 1.051) | 2,128 | 8  | 0.376<br>(0.116 – 0.636) | 1,729 | 12 | 0.694<br>(0.303 – 1.085) |
| ≥ 80                       | 1,339 | 13 | 0.971<br>(0.446 – 1.496) | 1,186 | 6  | 0.506<br>(0.102 – 0.910) | 1,000 | 10 | 1.000<br>(0.383 – 1.617) |
| Median Age<br>(years, IQR) |       |    | 58.0<br>(51.5 – 69.0)    |       |    | 52.0<br>(38.0 – 59.3)    |       |    | 48.0<br>(34.0 – 66.0)    |



**Table S2 (continued).** COVID-19 Seroprevalence of Alberta by age group and sex at each monthly snapshot ( $N = 93,993$ ).

| Demographic       | December                |                                              |                          | January 2021            |                                              |                           |
|-------------------|-------------------------|----------------------------------------------|--------------------------|-------------------------|----------------------------------------------|---------------------------|
|                   | Survey size<br><i>n</i> | IgG Positive count<br><i>n<sub>POS</sub></i> | % IgG Positive (95% CI)  | Survey size<br><i>n</i> | IgG Positive count<br><i>n<sub>POS</sub></i> | % IgG Positive (95% CI)   |
| Overall, crude    | 12,076                  | 241                                          | 1.996<br>(1.746 - 2.245) | 11,015                  | 400                                          | 3.620<br>(3.272 - 3.969)  |
| Overall, adjusted |                         |                                              | 2.462<br>(2.447 - 2.476) |                         |                                              | 4.622<br>(4.602 - 4.641)  |
| Sex               |                         |                                              |                          |                         |                                              |                           |
| Male              | 5,418                   | 123                                          | 2.270<br>(1.874 - 2.667) | 4,984                   | 172                                          | 3.451<br>(2.944 - 3.958)  |
| Female            | 6,657                   | 118                                          | 1.773<br>(1.456 - 2.090) | 6,066                   | 228                                          | 3.759<br>(3.280 - 4.237)  |
| Unknown           | 1                       | 0                                            | 0<br>(0.000 - 0.000)     | 0                       | -                                            | -                         |
| Age group (y)     |                         |                                              |                          |                         |                                              |                           |
| 0-9               | 119                     | 3                                            | 2.521<br>(0.000 - 5.338) | 97                      | 7                                            | 7.216<br>(2.067 - 12.366) |
| 10-19             | 374                     | 7                                            | 1.872<br>(0.498 - 3.245) | 329                     | 16                                           | 4.863<br>(2.539 - 7.187)  |
| 20-29             | 917                     | 31                                           | 3.381<br>(2.211 - 4.550) | 909                     | 43                                           | 4.730<br>(3.350 - 6.111)  |
| 30-39             | 1655                    | 55                                           | 3.323<br>(2.459 - 4.187) | 1480                    | 75                                           | 5.068<br>(3.950 - 6.185)  |
| 40-49             | 1663                    | 36                                           | 2.165<br>(1.465 - 2.864) | 1559                    | 64                                           | 4.105<br>(3.120 - 5.090)  |

|                            |      |    |                          |      |    |                          |
|----------------------------|------|----|--------------------------|------|----|--------------------------|
| 50-59                      | 2009 | 43 | 2.140<br>(1.508 - 2.773) | 1859 | 70 | 3.765<br>(2.900 - 4.631) |
| 60-69                      | 2519 | 37 | 1.469<br>(0.999 - 1.939) | 2301 | 73 | 3.173<br>(2.456 - 3.889) |
| 70-79                      | 1761 | 21 | 1.193<br>(0.686 - 1.699) | 1614 | 37 | 2.292<br>(1.562 - 3.023) |
| ≥ 80                       | 1059 | 8  | 0.755<br>(0.234 - 1.277) | 901  | 15 | 1.665<br>(0.829 - 2.501) |
| Median Age<br>(years, IQR) |      |    | 46.0<br>(34.0 – 60.0)    |      |    | 48.0<br>(34.0 – 63.0)    |

**Table S3.** COVID-19 Seroprevalence by cities or areas of residence at each monthly snapshot, unknown and out of province postal codes excluded ( $N = 92,751$ ).

| City/Area      | June                    |                                               |                            | July                    |                                               |                            | August                  |                                               |                            |
|----------------|-------------------------|-----------------------------------------------|----------------------------|-------------------------|-----------------------------------------------|----------------------------|-------------------------|-----------------------------------------------|----------------------------|
|                | Survey size<br><i>n</i> | IgG Positive count<br><i>n</i> <sub>POS</sub> | % IgG Positive<br>(95% CI) | Survey size<br><i>n</i> | IgG Positive count<br><i>n</i> <sub>POS</sub> | % IgG Positive<br>(95% CI) | Survey size<br><i>n</i> | IgG Positive count<br><i>n</i> <sub>POS</sub> | % IgG Positive<br>(95% CI) |
| Calgary        | 737                     | 26                                            | 3.528<br>(2.196 – 4.860)   | 3,795                   | 22                                            | 0.580<br>(0.338 – 0.821)   | 3,362                   | 28                                            | 0.833<br>(0.526 – 1.140)   |
| Edmonton       | 2,988                   | 5                                             | 0.167<br>(0.021 – 0.314)   | 2,768                   | 8                                             | 0.289<br>(0.089 – 0.489)   | 2,833                   | 9                                             | 0.318<br>(0.110 – 0.525)   |
| Red Deer       | 341                     | 2                                             | 0.587<br>(0.000 – 1.397)   | 326                     | 1                                             | 0.307<br>(0.000 – 0.907)   | 375                     | 0                                             | 0<br>(0.000 – 0.000)       |
| Lethbridge     | 198                     | 0                                             | 0<br>(0.000 – 0.000)       | 601                     | 0                                             | 0<br>(0.000 – 0.000)       | 625                     | 2                                             | 0.320<br>(0.000 – 0.763)   |
| Medicine Hat   | 607                     | 3                                             | 0.494<br>(0.000 – 1.052)   | 594                     | 0                                             | 0<br>(0.000 – 0.000)       | 521                     | 3                                             | 0.576<br>(0.000 – 1.226)   |
| Grande Prairie | 448                     | 3                                             | 0.670<br>(0.000 – 1.425)   | 445                     | 0                                             | 0<br>(0.000 – 0.000)       | 318                     | 2                                             | 0.629<br>(0.000 – 1.498)   |
| Brooks         | 86                      | 17                                            | 19.77<br>(11.35 – 28.18)   | 179                     | 25                                            | 13.97<br>(8.888 – 19.05)   | 143                     | 23                                            | 16.08<br>(10.06 – 22.11)   |
|                |                         |                                               |                            |                         |                                               |                            |                         |                                               |                            |
| Rural          | 1,164                   | 14                                            | 1.203<br>(0.577 – 1.829)   | 1,826                   | 5                                             | 0.274<br>(0.034 – 0.514)   | 1,484                   | 19                                            | 1.280<br>(0.708 – 1.852)   |
| Alberta, Other | 1,806                   | 8                                             | 0.443<br>(0.137 - 0.749)   | 2,577                   | 6                                             | 0.233<br>(0.047 - 0.419)   | 2,305                   | 5                                             | 0.217<br>(0.027 - 0.407)   |

**Table S3 (continued).** COVID-19 Seroprevalence by cities or areas of residence at each monthly snapshot, unknown and out of province postal codes excluded ( $N = 92,751$ ).

| City/Area      | September               |                                              |                            | October                 |                                              |                            | November                |                                              |                            |
|----------------|-------------------------|----------------------------------------------|----------------------------|-------------------------|----------------------------------------------|----------------------------|-------------------------|----------------------------------------------|----------------------------|
|                | Survey size<br><i>n</i> | IgG Positive count<br><i>n<sub>POS</sub></i> | % IgG Positive<br>(95% CI) | Survey size<br><i>n</i> | IgG Positive count<br><i>n<sub>POS</sub></i> | % IgG Positive<br>(95% CI) | Survey size<br><i>n</i> | IgG Positive count<br><i>n<sub>POS</sub></i> | % IgG Positive<br>(95% CI) |
| Calgary        | 3,626                   | 23                                           | 0.634<br>(0.376 – 0.893)   | 3,603                   | 26                                           | 0.722<br>(0.445 – 0.998)   | 3,481                   | 16                                           | 0.460<br>(0.235 – 0.684)   |
| Edmonton       | 2,508                   | 27                                           | 1.077<br>(0.673 – 1.480)   | 3,083                   | 20                                           | 0.649<br>(0.365 – 0.932)   | 2,737                   | 51                                           | 1.863<br>(1.357 – 2.370)   |
| Red Deer       | 244                     | 0                                            | 0<br>(0.000 – 0.000)       | 286                     | 1                                            | 0.350<br>(0.000 – 1.034)   | 298                     | 0                                            | 0<br>(0.000 – 0.000)       |
| Lethbridge     | 632                     | 3                                            | 0.475<br>(0.000 – 1.011)   | 571                     | 2                                            | 0.350<br>(0.000 – 0.835)   | 576                     | 5                                            | 0.868<br>(0.110 – 1.626)   |
| Medicine Hat   | 600                     | 1                                            | 0.167<br>(0.000 – 0.493)   | 658                     | 0                                            | 0<br>(0.000 – 0.000)       | 426                     | 0                                            | 0<br>(0.000 – 0.000)       |
| Grande Prairie | 381                     | 3                                            | 0.787<br>(0.000 – 1.675)   | 480                     | 1                                            | 0.208<br>(0.000 – 0.616)   | 169                     | 1                                            | 0.592<br>(0.000 – 1.748)   |
| Brooks         | 162                     | 11                                           | 6.790<br>(2.916 – 10.66)   | 169                     | 18                                           | 10.65<br>(6.000 – 15.30)   | 134                     | 11                                           | 8.209<br>(3.561 – 12.86)   |
|                |                         |                                              |                            |                         |                                              |                            |                         |                                              |                            |
| Rural          | 1,591                   | 34                                           | 2.137<br>(1.426 – 2.848)   | 1,928                   | 45                                           | 2.334<br>(1.660 – 3.008)   | 1,291                   | 33                                           | 2.556<br>(1.695 – 3.417)   |
| Alberta, Other | 2,113                   | 9                                            | 0.426<br>(0.148 – 0.704)   | 2,571                   | 6                                            | 0.233<br>(0.047 – 0.420)   | 2,212                   | 12                                           | 0.542<br>(0.236 – 0.849)   |

**Table S3 (continued).** COVID-19 Seroprevalence by cities or areas of residence at each monthly snapshot, unknown and out of province postal codes excluded ( $N = 92,751$ ).

| City/Area      | December                |                                              |                            | January 2021            |                                              |                            |
|----------------|-------------------------|----------------------------------------------|----------------------------|-------------------------|----------------------------------------------|----------------------------|
|                | Survey size<br><i>n</i> | IgG Positive count<br><i>n<sub>POS</sub></i> | % IgG Positive<br>(95% CI) | Survey size<br><i>n</i> | IgG Positive count<br><i>n<sub>POS</sub></i> | % IgG Positive<br>(95% CI) |
| Calgary        | 3,511                   | 55                                           | 1.567<br>(1.156 – 1.977)   | 3,364                   | 114                                          | 3.389<br>(2.777 - 4.000)   |
| Edmonton       | 2,904                   | 96                                           | 3.306<br>(2.656 – 3.956)   | 2,439                   | 145                                          | 5.945<br>(5.006 - 6.884)   |
| Red Deer       | 279                     | 1                                            | 0.358<br>(0.000 – 1.060)   | 322                     | 11                                           | 3.416<br>(1.432 - 5.400)   |
| Lethbridge     | 278                     | 3                                            | 1.079<br>(0.000 – 2.294)   | 621                     | 5                                            | 0.805<br>(0.102 - 1.508)   |
| Medicine Hat   | 504                     | 1                                            | 0.198<br>(0.000 – 0.587)   | 503                     | 3                                            | 0.596<br>(0.000 - 1.269)   |
| Grande Prairie | 277                     | 2                                            | 0.722<br>(0.000 – 1.719)   | 101                     | 0                                            | 0.000<br>(0.000 - 0.000)   |
| Brooks         | 151                     | 8                                            | 5.298<br>(1.725 – 8.871)   | 146                     | 11                                           | 7.534<br>(3.253 - 11.82)   |
|                |                         |                                              |                            |                         |                                              |                            |
| Rural          | 1,506                   | 39                                           | 2.590<br>(1.787 – 3.392)   | 1,317                   | 58                                           | 4.404<br>(3.296 - 5.512)   |
| Alberta, Other | 2,474                   | 27                                           | 1.091<br>(0.682 - 1.501)   | 2,072                   | 47                                           | 2.268<br>(1.627 - 2.909)   |

**Table S4.** Socioeconomic characteristics of IgG negative and positive patients' neighborhoods of residence from the Alberta Serosurvey, June 2020 – January 2021.<sup>a</sup>

| Category                            | IgG NEGATIVE      |                 | IgG POSITIVE      |                 | <i>p</i> <sup>NEG-POS</sup> <sup>c</sup> |
|-------------------------------------|-------------------|-----------------|-------------------|-----------------|------------------------------------------|
|                                     | Mean <sup>b</sup> | 95% CI          | Mean <sup>b</sup> | 95% CI          |                                          |
| Median Household Income (CAD)       | 97,500            | 97,300 - 97,800 | 87,500            | 85,600 - 89,500 | < 0.001                                  |
| Married/Common-Law (ref: Single, %) | 59.2              | 59.1 - 59.2     | 58.1              | 57.5 - 58.7     | < 0.001                                  |
| Average Household Size              | 2.61              | 2.61 - 2.62     | 2.72              | 2.69 - 2.76     | < 0.001                                  |
| <b>Highest Level of Education</b>   |                   |                 |                   |                 |                                          |
| Below High School (%)               | 17.5              | 17.4 - 17.5     | 21.0              | 20.4 - 21.7     | < 0.001                                  |
| High School (%)                     | 28.2              | 28.1 - 28.2     | 28.9              | 28.5 - 29.3     | < 0.001                                  |
| Diploma/Certificate (%)             | 31.8              | 31.7 - 31.8     | 29.9              | 29.4 - 30.3     | < 0.001                                  |
| Bachelor's (%)                      | 22.5              | 22.5 - 22.6     | 20.1              | 19.4 - 20.9     | < 0.001                                  |
| Graduate/Prof. Degree (%)           | 5.40              | 5.37 - 5.44     | 4.86              | 4.58 - 5.13     | < 0.001                                  |
| <b>Immigration Status</b>           |                   |                 |                   |                 |                                          |
| Immigrant (%)                       | 21.2              | 21.1 - 21.3     | 27.2              | 26.3 - 28.2     | < 0.001                                  |
| Immigrant Last 5 yrs (%)            | 5.13              | 5.10 - 5.17     | 8.23              | 7.78 - 8.68     | < 0.001                                  |
| Non-Permanent Resident (%)          | 1.76              | 1.74 - 1.78     | 2.13              | 1.93 - 2.33     | < 0.001                                  |
| <b>Visible Minority Group</b>       |                   |                 |                   |                 |                                          |
| Any Visible Minority (%)            | 22.9              | 22.7 - 23.0     | 30.9              | 29.5 - 32.4     | < 0.001                                  |
| Aboriginal (%)                      | 5.61              | 5.56 - 5.66     | 6.42              | 5.67 - 7.17     | 0.034                                    |
| African (%)                         | 3.17              | 3.14 - 3.20     | 5.81              | 5.33 - 6.30     | < 0.001                                  |
| Chinese (%)                         | 3.86              | 3.82 - 3.90     | 3.63              | 3.31 - 3.95     | 0.157                                    |
| East Asian (Excl. Chinese) (%)      | 6.01              | 5.97 - 6.05     | 7.66              | 7.26 - 8.06     | < 0.001                                  |
| Latin American (%)                  | 5.66              | 5.59 - 5.73     | 8.48              | 7.63 - 9.32     | < 0.001                                  |

|                    |      |             |      |             |         |
|--------------------|------|-------------|------|-------------|---------|
| Middle Eastern (%) | 1.38 | 1.37 - 1.39 | 1.75 | 1.61 - 1.89 | < 0.001 |
| South Asian (%)    | 1.85 | 1.82 - 1.87 | 2.50 | 2.27 - 2.74 | < 0.001 |
|                    |      |             |      |             |         |

<sup>a</sup> Unknown address and out of province residents excluded;  $n = 92,758$ ;  $n_{POS} = 1,217$

<sup>b</sup> Mean figures for Serosurvey patients' neighbourhoods calculated from census-derived statistics of their Dissemination Areas (DAs) of residence.

<sup>c</sup> p-value calculated from t-test comparing IgG Negative and Positive patients.

**Table S5.** Count of Albertans from the Serosurveys according to their NAAT and IgG results with different criteria ( $N = 66,171$ )<sup>a</sup>

| NAAT Testing Status/Result         | IgG Result ( $\geq 1.4\text{RU} + \text{DS}$ ) |                   | IgG Result ( $\geq 1.4 \text{ RU}$ ) |                   | IgG Result ( $\geq 0.7 \text{ RU}$ ) |                   |
|------------------------------------|------------------------------------------------|-------------------|--------------------------------------|-------------------|--------------------------------------|-------------------|
|                                    | Positive (%)                                   | Negative (%)      | Positive (%)                         | Negative (%)      | Positive (%)                         | Negative (%)      |
| No prior NAAT result found         | 485 (0.73)                                     | 65,686<br>(99.27) | 804 (1.22)                           | 65,667<br>(99.23) | 1400 (2.12)                          | 65,071<br>(98.33) |
| Any prior NAAT result              |                                                |                   |                                      |                   |                                      |                   |
| At least one Positive result       | 573 (0.87)                                     | 294 (0.44)        | 662 (1.00)                           | 207 (0.31)        | 739 (1.12)                           | 130 (0.20)        |
| Only Negative/Inconclusive results | 179 (0.27)                                     | 25,665<br>(38.79) | 309 (0.47)                           | 25,538<br>(38.59) | 539 (0.81)                           | 25,308<br>(38.25) |
| Any NAAT result > 2 weeks prior    |                                                |                   |                                      |                   |                                      |                   |
| At least one Positive result       | 551 (0.83)                                     | 214 (0.32)        | 618 (0.93)                           | 147 (0.22)        | 690 (1.04)                           | 75 (0.11)         |
| Only Negative/Inconclusive results | 180 (0.27)                                     | 23,259<br>(35.15) | 302 (0.46)                           | 23,137<br>(34.97) | 516 (0.78)                           | 22,923<br>(34.64) |

<sup>a</sup> Excluding Albertans with no recorded personal healthcare numbers.



**Table S6.** Select demographic distributions of seropositive patients (N = 1237) according to their prior status by NAAT.

| Demographic Category                 | Positive NAAT |                 | Negative or no NAAT |                 | <i>p</i> <sup>a</sup> |
|--------------------------------------|---------------|-----------------|---------------------|-----------------|-----------------------|
|                                      | %             | 95% CI          | %                   | 95% CI          |                       |
| <b>Sex</b>                           |               |                 |                     |                 |                       |
| Male                                 | 44.3          | 40.3 - 48.4     | 47.1                | 43.3 - 50.9     | 0.323                 |
| Female                               | 55.7          | 51.6 - 59.7     | 52.9                | 49.1 - 56.7     | 0.323                 |
|                                      |               |                 |                     |                 |                       |
| <b>Age group (y)</b>                 |               |                 |                     |                 |                       |
| 0-9                                  | 0.7           | 0.1 - 1.3       | 2.9                 | 1.6 - 4.1       | 0.005                 |
| 10-19                                | 2.8           | 1.5 - 4.0       | 4.2                 | 2.7 - 5.7       | 0.177                 |
| 20-29                                | 9.4           | 7.2 - 11.6      | 13.0                | 10.4 - 15.5     | 0.051                 |
| 30-39                                | 15.7          | 12.9 - 18.5     | 18.7                | 15.7 - 21.6     | 0.169                 |
| 40-49                                | 17.5          | 14.6 - 20.3     | 15.1                | 12.3 - 17.8     | 0.255                 |
| 50-59                                | 19.4          | 16.4 - 22.4     | 18.1                | 15.1 - 21.0     | 0.559                 |
| 60-69                                | 16.1          | 13.3 - 18.8     | 16.0                | 13.2 - 18.7     | 0.965                 |
| 70-79                                | 9.4           | 7.2 - 11.6      | 9.5                 | 7.3 - 11.7      | 0.970                 |
| ≥ 80                                 | 9.1           | 6.9 - 11.3      | 2.7                 | 1.5 - 3.9       | < 0.001               |
|                                      |               |                 |                     |                 |                       |
| <b>Geography</b>                     |               |                 |                     |                 |                       |
| Urban, Major – Calgary               | 28.7          | 25.0 - 32.4     | 22.1                | 18.9 - 25.3     | 0.009                 |
| Urban, Major – Edmonton              | 33.0          | 29.2 - 36.9     | 26.6                | 23.2 - 30.0     | 0.014                 |
| Urban, Midsize                       | 26.2          | 22.6 - 29.8     | 23.7                | 20.4 - 27.0     | 0.306                 |
| Rural                                | 12.1          | 9.4 - 14.7      | 27.6                | 24.1 - 31.0     | < 0.001               |
|                                      |               |                 |                     |                 |                       |
| <b>Median Household Income (CAD)</b> | 92,000        | 89,000 – 94,900 | 83,600              | 81,300 - 86,300 | < 0.001               |

<sup>a</sup>p-value calculated using chi-square tests for sex and age variables; using t-tests for geography and household income variables.
